# Supplementary material for: Potential Markers for Selecting Self-Eliminating Apple Genotypes
Source: MDPI journal article supplement (doi:10.3390/plants10081612), 2021-08-05
Supplement: s1 [file s1]

Article

# Potential Markers for Selecting Self-Eliminating Apple Genotypes

Aurelijus Starkus, Birute Frercks \*, Dalia Gelvonauskiene, Ingrida Mazeikiene, Rytis Rugienius, Vidmantas Bendokas and Vidmantas Stanys

Department of Orchard Plant Genetics and Biotechnology, Institute of Horticulture, Lithuanian Research Centre for Agriculture and Forestry, Babtai, LT-54333 Kaunas, Lithuania; [aurelijusstarkus@gmail.com](mailto:aurelijusstarkus@gmail.com) (A.S.); [dalia.gelvonauskiene@lammc.lt](mailto:dalia.gelvonauskiene@lammc.lt) (D.G.); [ingrida.mazeikiene@lammc.lt](mailto:ingrida.mazeikiene@lammc.lt) (I.M.); [rytis.rugienius@lammc.lt](mailto:rytis.rugienius@lammc.lt) (R.R.); [vidmantas.bendokas@lammc.lt](mailto:vidmantas.bendokas@lammc.lt) (V.B.); [vidmantas.stanys@lammc.lt](mailto:vidmantas.stanys@lammc.lt) (V.S.)

\* Correspondence: [birute.frercks@lammc.lt](mailto:birute.frercks@lammc.lt); Tel.: +370-37-555-253

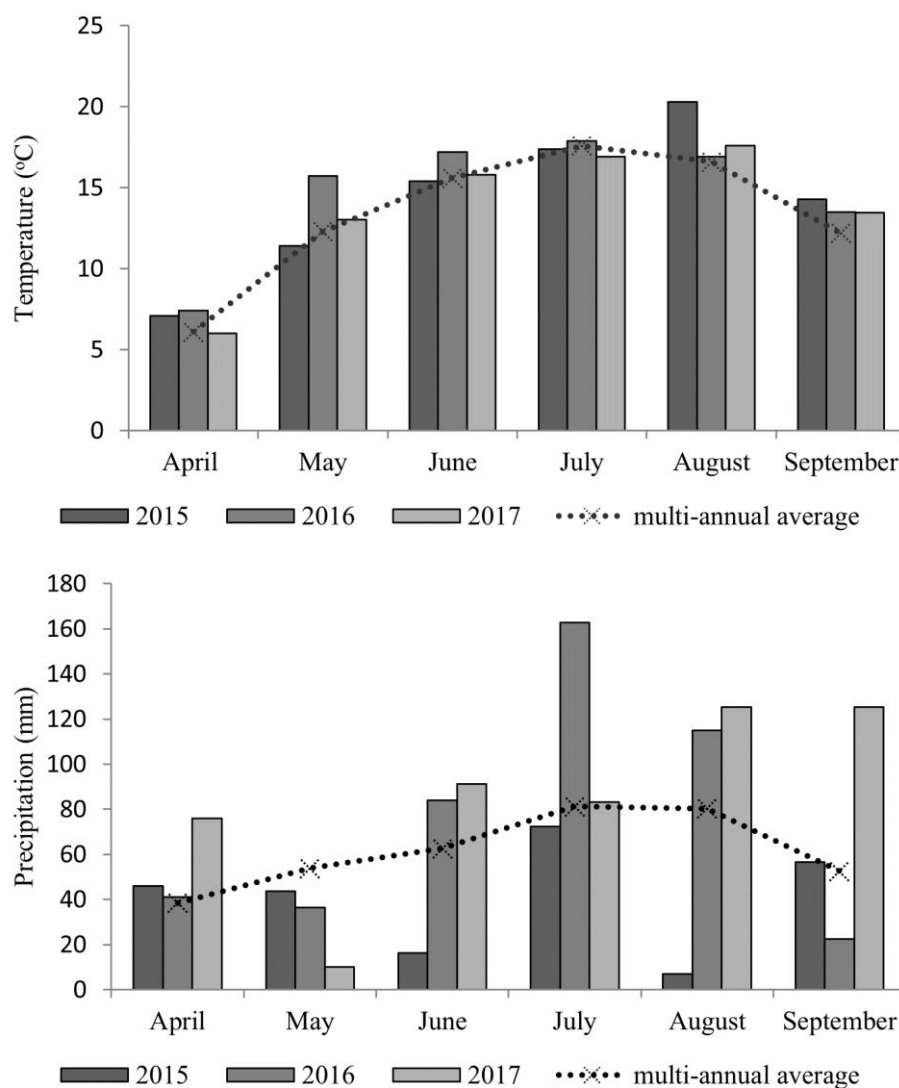

**Figure S1.** The Meteorological conditions during investigation of apple harvest self-regulation.
